# Supplementary material for: Endothelial Akt1 loss promotes prostate cancer metastasis via β-catenin-regulated tight-junction protein turnover
Source: PubMed Central journal article supplement (PMC5988746; doi:10.1038/s41416-018-0110-1), 2018-05-14
Supplement: 41416_2018_110_MOESM1_ESM.pdf [file 41416_2018_110_MOESM1_ESM.pdf]

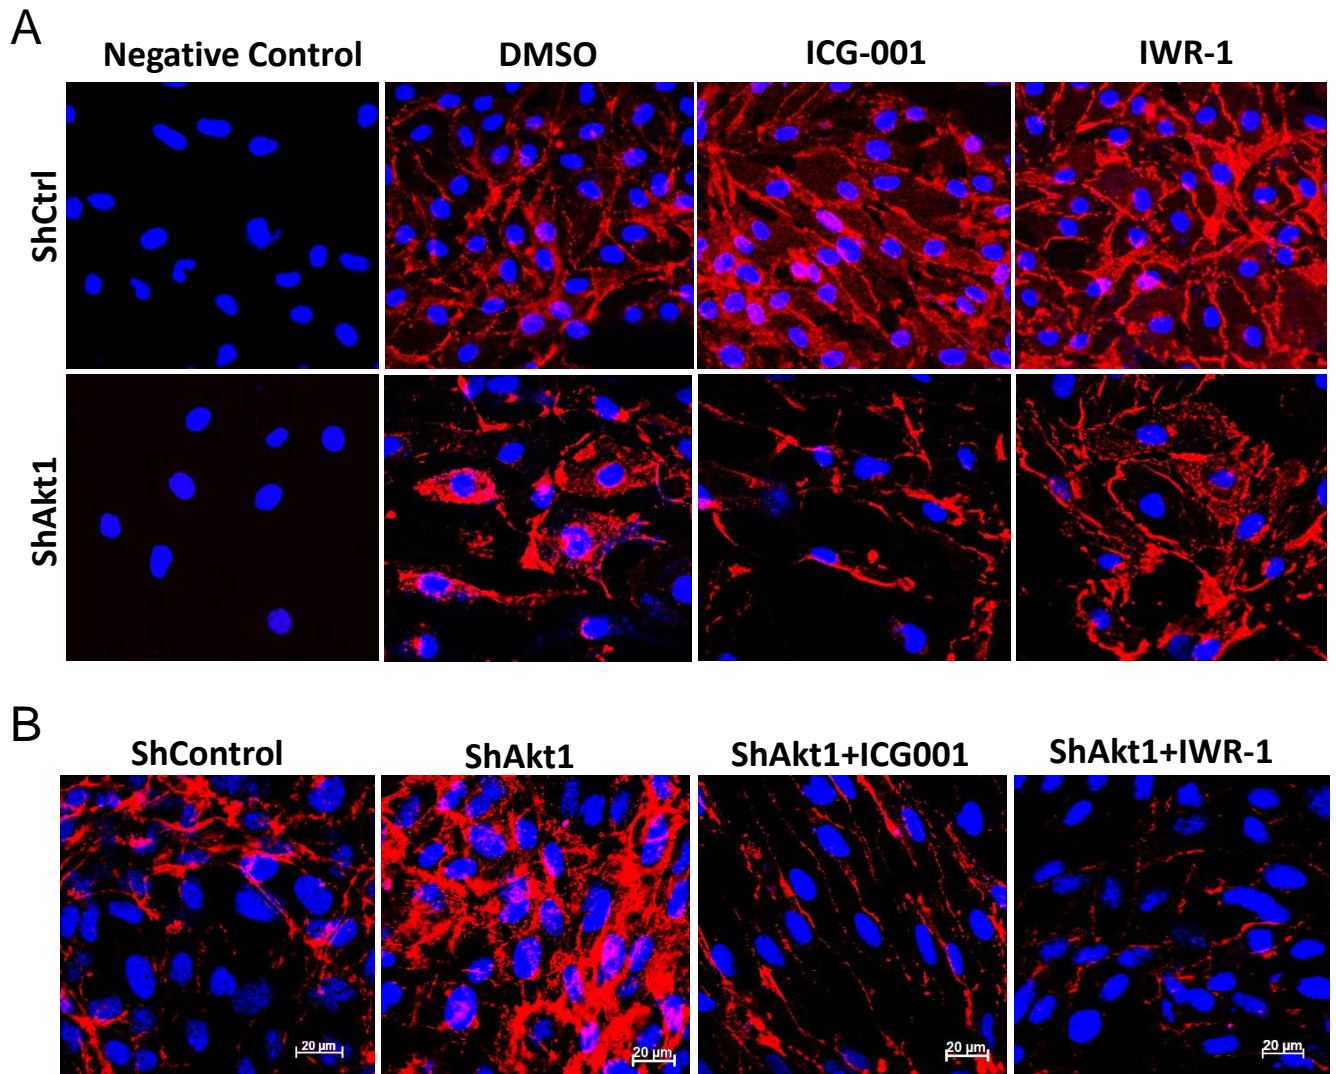

**Supplemental Figure 1: Akt1 gene silencing in HLEC increases  $\beta$ -catenin nuclear localization.** (A) Representative confocal images of  $\beta$ -catenin and DAPI in ShAkt1 HLEC monolayers treated with control DMSO and  $\beta$ -catenin inhibitors (ICG001 and IWR-1) compared to the negative control where non-immune serum was used as a control (n=6). Red indicates total  $\beta$ -catenin and green indicates DAPI staining. Red indicates total  $\beta$ -catenin and Blue indicates DAPI staining. (B) Representative confocal images of p $\beta$ -catenin and DAPI stained ShAkt1 HLEC monolayers treated with control DMSO and  $\beta$ -catenin inhibitors (ICG001 and IWR-1) (n=6). Red indicates phosphorylated  $\beta$ -catenin and Blue indicates DAPI staining.
